# Supplementary material
Source: Atypon-hosted journal article supplement (https://mail.jpma.org.pk/PdfDownloadsupplements/397)
Supplement: 397 [file 397]

One moment, please...


# Please wait while your request is being verified...
